# Supplementary material for: Effect of Botulinum Toxin Injections in the Treatment of Spasticity of Different Etiologies: An Umbrella Review
Source: MDPI journal article supplement (doi:10.3390/ph17030310), 2024-02-28
Supplement: s1 [file s1]

## SUPPLEMENTARY MATERIAL

**Supplementary Table 1:** Modified Ashworth Scale.

|    |                                                                                                                                                                            |
|----|----------------------------------------------------------------------------------------------------------------------------------------------------------------------------|
| 0  | No increase muscle tone                                                                                                                                                    |
| 1  | Slight increase in muscle tone, with a catch and release or minimal resistance at the end of the range of motion when an affected part(s) is moved in flexion or extension |
| 1+ | Slight increase in muscle tone, manifested as a catch, followed by minimal resistance through the remainder (less than half) of the range of motion                        |
| 2  | More marked increase in muscle tone throughout most of the range of motion, but affected part(s) are still easily moved                                                    |
| 3  | Considerable increase in muscle tone, passive movement difficult                                                                                                           |
| 4  | Affected part(s) rigid in flexion or extension                                                                                                                             |

*Adapted from Yam W,K and Leung. [5]*

**Supplementary Table 2:**

| <b>Quality of muscle reaction</b>                                                                                                                                                                                                                                      |                                                                                               |
|------------------------------------------------------------------------------------------------------------------------------------------------------------------------------------------------------------------------------------------------------------------------|-----------------------------------------------------------------------------------------------|
| 0                                                                                                                                                                                                                                                                      | No resistance throughout the course of the passive movement                                   |
| 1                                                                                                                                                                                                                                                                      | Slight resistance through the course of passive movement: no clear “catch” at a precise angle |
| 2                                                                                                                                                                                                                                                                      | Clear catch at a precise angle, interrupting the passive movement, followed by release        |
| 3                                                                                                                                                                                                                                                                      | Fatiguable clonus (< 10s when maintaining the pressure) appearing at a precise angle          |
| 4                                                                                                                                                                                                                                                                      | Unfatiguable clonus (>10s when maintaining the pressure) at a precise angle                   |
| 5                                                                                                                                                                                                                                                                      | Joint immovable                                                                               |
| <b>Joint angles</b>                                                                                                                                                                                                                                                    |                                                                                               |
| <i>Measure relative to the position of minimal stretch of the muscle (corresponding to angle zero) for all joints except the hip, where it is relative to the resting anatomic position (eg, angle zero corresponds to the ankle at 90 deg and the hip at midline)</i> |                                                                                               |
| R1                                                                                                                                                                                                                                                                     | Angle of muscle reaction                                                                      |
| R2                                                                                                                                                                                                                                                                     | Angle of full range of motion (passive range of motion)                                       |
| <b>Definition of velocities used</b>                                                                                                                                                                                                                                   |                                                                                               |
| V1                                                                                                                                                                                                                                                                     | As slow as possible (slower than the natural drop of the limb segment under gravity)          |
| V2                                                                                                                                                                                                                                                                     | Speed of the limb segment falling under gravity                                               |
| V3                                                                                                                                                                                                                                                                     | As fast as possible (faster than the rate the natural drop of the limb segment under gravity) |

*Adapted from Yam W,K and Leung. [5]*

**Supplementary Table 3:** Search strategy

|                                 |            |                                         |            |                                                                                    |            |                                                                                                              |
|---------------------------------|------------|-----------------------------------------|------------|------------------------------------------------------------------------------------|------------|--------------------------------------------------------------------------------------------------------------|
| Children<br><b>OR</b><br>Adults | <b>AND</b> | Botulinum toxin<br><b>OR</b><br>Botox A | <b>AND</b> | Cerebral<br>palsy<br><b>OR</b><br>Spasticity<br><b>OR</b><br>Spastic<br>paraplegia | <b>AND</b> | Systematic Review<br><b>OR</b><br>RS<br><b>OR</b><br>Meta-analysis<br><b>OR</b><br>Network meta-<br>analysis |
|---------------------------------|------------|-----------------------------------------|------------|------------------------------------------------------------------------------------|------------|--------------------------------------------------------------------------------------------------------------|

**Supplementary Table 4:** Assessment of the methodological quality of the included systematic reviews using the AMSTAR 2 tool.

| Reference                      | 1 | 2  | 3 | 4 | 5 | 6 | 7 | 8 | 9  | 10 | 11 | 12 | 13 | 14 | 15 | 16 | Risk of bias   |
|--------------------------------|---|----|---|---|---|---|---|---|----|----|----|----|----|----|----|----|----------------|
| Reeuwijk A et al (2006)        | Y | PY | Y | Y | Y | Y | Y | Y | Y  | N  | N  | NA | Y  | Y  | NA | N  | Critically low |
| Demetrios M et al (2013)       | Y | Y  | Y | Y | Y | Y | Y | Y | Y  | N  | NA | NA | Y  | Y  | NA | Y  | Moderate       |
| Phadke CP et al (2014)         | Y | PY | Y | Y | Y | Y | Y | Y | NA | Y  | NA | NA | Y  | Y  | NA | Y  | Moderate       |
| García Salazar LF et al (2015) | Y | PY | Y | Y | Y | Y | Y | Y | Y  | N  | NA | NA | Y  | N  | NA | Y  | Moderate       |
| Dashtipour K et al (2015)      | Y | Y  | Y | Y | N | N | Y | Y | Y  | Y  | NA | NA | Y  | Y  | NA | Y  | Moderate       |
| Fonseca Junior PR et al (2017) | Y | PY | Y | Y | Y | Y | Y | Y | Y  | N  | NA | NA | Y  | Y  | NA | Y  | Moderate       |
| Gupta AD et al (2018)          | Y | Y  | Y | Y | Y | Y | Y | Y | Y  | N  | NA | NA | Y  | Y  | NA | Y  | Moderate       |

|                       |   |    |   |   |   |   |   |   |   |   |    |    |   |   |    |   |          |
|-----------------------|---|----|---|---|---|---|---|---|---|---|----|----|---|---|----|---|----------|
| Yana M et al (2019)   | Y | PY | Y | Y | Y | Y | Y | Y | Y | N | NA | NA | Y | Y | NA | Y | Moderate |
| Hara T et al (2019)   | Y | PY | Y | Y | Y | Y | Y | Y | Y | N | NA | NA | Y | Y | NA | Y | Moderate |
| Farag SM et al (2020) | Y | PY | Y | Y | Y | Y | Y | Y | Y | Y | NA | NA | Y | N | NA | Y | Moderate |
| Klein C et al (2023)  | Y | PY | Y | Y | Y | Y | Y | Y | Y | Y | NA | NA | Y | N | NA | Y | Moderate |
| Yang H et al (2023)   | Y | Y  | Y | Y | Y | Y | Y | Y | Y | N | NA | NA | Y | Y | NA | Y | Moderate |

| Reference                      | 1 | 2  | 3 | 4 | 5 | 6 | 7 | 8 | 9  | 10 | 11 | 12 | 13 | 14 | 15 | 16 | Risk of bias   |
|--------------------------------|---|----|---|---|---|---|---|---|----|----|----|----|----|----|----|----|----------------|
| Reeuwijk A et al (2006)        | Y | PY | Y | Y | Y | Y | Y | Y | Y  | N  | N  | CA | Y  | Y  | CA | N  | Critically low |
| Demetrios M et al (2013)       | Y | Y  | Y | Y | Y | Y | Y | Y | Y  | N  | CA | CA | Y  | Y  | CA | Y  | Moderate       |
| Phadke CP et al (2014)         | Y | PY | Y | Y | Y | Y | Y | Y | CA | Y  | CA | CA | Y  | Y  | CA | Y  | Moderate       |
| García Salazar LF et al (2015) | Y | PY | Y | Y | Y | Y | Y | Y | Y  | N  | CA | CA | Y  | N  | CA | Y  | Moderate       |
| Dashtipour K et al (2015)      | Y | Y  | Y | Y | N | N | Y | Y | Y  | Y  | CA | CA | Y  | Y  | CA | Y  | Moderate       |
| Fonseca Junior PR et al (2017) | Y | PY | Y | Y | Y | Y | Y | Y | Y  | N  | CA | CA | Y  | Y  | CA | Y  | Moderate       |
| Gupta AD et al (2018)          | Y | Y  | Y | Y | Y | Y | Y | Y | Y  | N  | CA | CA | Y  | Y  | CA | Y  | Moderate       |
| Yana M et al (2019)            | Y | PY | Y | Y | Y | Y | Y | Y | Y  | N  | CA | CA | Y  | Y  | CA | Y  | Moderate       |
| Hara T et al (2019)            | Y | PY | Y | Y | Y | Y | Y | Y | Y  | N  | CA | CA | Y  | Y  | CA | Y  | Moderate       |
| Farag SM et al (2020)          | Y | PY | Y | Y | Y | Y | Y | Y | Y  | Y  | CA | CA | Y  | N  | CA | Y  | Moderate       |



|                               |   |   |   |   |   |   |   |   |   |   |   |   |   |   |   |   |          |
|-------------------------------|---|---|---|---|---|---|---|---|---|---|---|---|---|---|---|---|----------|
| Baker JA and Pereira G (2013) | Y | Y | Y | Y | N | N | Y | Y | Y | Y | Y | Y | Y | Y | Y | Y | Moderate |
| Wu T et al (2016)             | Y | Y | Y | Y | Y | Y | Y | Y | Y | N | Y | Y | Y | Y | Y | Y | High     |
| Dong Y et al (2017)           | Y | Y | Y | Y | Y | Y | Y | Y | Y | N | Y | Y | Y | Y | Y | Y | High     |
| Guyot P et al (2019)          | Y | Y | Y | Y | Y | Y | Y | Y | Y | N | Y | Y | Y | Y | Y | Y | High     |
| Blumetti FC et al (2019)      | Y | Y | Y | Y | Y | Y | Y | Y | Y | Y | Y | Y | Y | Y | Y | Y | High     |
| Sun LC et al (2019)           | Y | Y | Y | Y | Y | Y | Y | Y | Y | N | Y | Y | Y | Y | Y | Y | High     |
| Jia S et al (2020)            | Y | Y | Y | Y | Y | Y | Y | Y | Y | N | Y | Y | Y | Y | Y | Y | High     |
| Doan TN et al (2021)          | Y | Y | Y | Y | Y | Y | Y | Y | Y | N | Y | Y | Y | Y | Y | Y | High     |
| Varvarousis DN et al (2021)   | Y | Y | Y | Y | Y | Y | Y | Y | Y | N | Y | Y | Y | Y | Y | Y | High     |
| Ojardias E et al (2022)       | Y | Y | Y | Y | Y | Y | Y | Y | Y | N | Y | Y | Y | Y | Y | Y | High     |

| Reference                | 1 | 2 | 3 | 4 | 5 | 6 | 7 | 8 | 9  | 10 | 11 | 12 | 13 | 14 | 15 | 16 | Risk of bias   |
|--------------------------|---|---|---|---|---|---|---|---|----|----|----|----|----|----|----|----|----------------|
| Boyd R and Hays R (2001) | Y | Y | Y | Y | N | N | Y | Y | N  | N  | Y  | N  | N  | Y  | N  | N  | Critically Low |
| Wasiak J et al (2004)    | Y | Y | Y | Y | Y | Y | Y | Y | PY | N  | Y  | N  | N  | Y  | Y  | N  | Low            |
| Cardoso E et al (2005)   | Y | Y | Y | Y | Y | Y | Y | Y | Y  | N  | Y  | Y  | N  | Y  | Y  | N  | Low            |

|                               |   |   |   |   |   |   |   |   |   |   |   |   |   |   |   |   |   |          |
|-------------------------------|---|---|---|---|---|---|---|---|---|---|---|---|---|---|---|---|---|----------|
| Rosales R et al (2008)        | Y | Y | Y | Y | Y | Y | Y | Y | Y | Y | N | Y | Y | Y | Y | Y | N | Moderate |
| Elia AE et al (2009)          | Y | Y | Y | Y | Y | Y | Y | Y | Y | Y | Y | N | Y | Y | Y | Y | Y | High     |
| Koog YH and Min BI (2010)     | Y | Y | Y | Y | Y | Y | Y | Y | Y | Y | Y | Y | Y | Y | Y | Y | N | High     |
| Baker JA and Pereira G (2013) | Y | Y | Y | Y | N | N | Y | Y | Y | Y | Y | Y | Y | Y | Y | Y | Y | Moderate |
| Wu T et al (2016)             | Y | Y | Y | Y | Y | Y | Y | Y | Y | Y | N | Y | Y | Y | Y | Y | Y | High     |
| Dong Y et al (2017)           | Y | Y | Y | Y | Y | Y | Y | Y | Y | Y | N | Y | Y | Y | Y | Y | Y | High     |
| Guyot P et al (2019)          | Y | Y | Y | Y | Y | Y | Y | Y | Y | Y | N | Y | Y | Y | Y | Y | Y | High     |
| Blumetti FC et al (2019)      | Y | Y | Y | Y | Y | Y | Y | Y | Y | Y | Y | Y | Y | Y | Y | Y | Y | High     |
| Sun LC et al (2019)           | Y | Y | Y | Y | Y | Y | Y | Y | Y | Y | N | Y | Y | Y | Y | Y | Y | High     |
| Jia S et al (2020)            | Y | Y | Y | Y | Y | Y | Y | Y | Y | Y | N | Y | Y | Y | Y | Y | Y | High     |
| Doan TN et al (2021)          | Y | Y | Y | Y | Y | Y | Y | Y | Y | Y | N | Y | Y | Y | Y | Y | Y | High     |
| Varvarousis DN et al (2021)   | Y | Y | Y | Y | Y | Y | Y | Y | Y | Y | N | Y | Y | Y | Y | Y | Y | High     |
| Ojardias E et al (2022)       | Y | Y | Y | Y | Y | Y | Y | Y | Y | Y | N | Y | Y | Y | Y | Y | Y | High     |

Y: yes; N: no; CA: cannot answer; PY: partial yes. 1) Did the research questions and inclusion criteria for the review include the components of PICO? 2) Did the report of the review contain an explicit statement that the review methods were established prior to the conduct of the review and did the report justify any significant deviations from the protocol? 3) Did the review authors explain their selection of the study designs for inclusion in the review? 4) Did the review authors use a comprehensive literature search strategy? 5) Did the review authors perform study selection in duplicate? 6) Did the review authors perform data extraction in

duplicate? 7) Did the review authors provide a list of excluded studies and justify the exclusions? 8) Did the review authors describe the included studies in adequate detail? 9) Did the review authors use a satisfactory technique for assessing the risk of bias (RoB) in individual studies that were included in the review? 10) Did the review authors report on the sources of funding for the studies included in the review? 11) If meta-analysis was performed did the review authors use appropriate methods for statistical combination of results? 12) If meta-analysis was performed, did the review authors assess the potential impact of RoB in individual studies on the results of the meta-analysis or other evidence synthesis? 13) Did the review authors account for RoB in individual studies when interpreting/ discussing the results of the review? 14) Did the review authors provide a satisfactory explanation for, and discussion of, any heterogeneity observed in the results of the review? 15) If they performed quantitative synthesis did the review authors carry out an adequate investigation of publication bias (small study bias) and discuss its likely impact on the results of the review? 16) Did the review authors report any potential sources of conflict of interest, including any funding they received for conducting the review?

**Supplementary table 6:** Quality grading of evidence.

| № of studies                   | Study design      | Risk of bias              | Certainty assessment      |              |             | Other considerations                             | № of patients  |              | Effect            |                                                      | Certainty        | Importance    |
|--------------------------------|-------------------|---------------------------|---------------------------|--------------|-------------|--------------------------------------------------|----------------|--------------|-------------------|------------------------------------------------------|------------------|---------------|
|                                |                   |                           | Inconsistency             | Indirectness | Imprecision |                                                  | [Intervention] | [Comparator] | Relative (95% CI) | Absolute (95% CI)                                    |                  |               |
| Waisak J et al (2004) [40]     |                   |                           |                           |              |             |                                                  |                |              |                   |                                                      |                  |               |
| 10                             | randomised trials | very serious <sup>a</sup> | very serious <sup>a</sup> | not serious  | not serious | publication bias strongly suspected <sup>a</sup> | 15             | 14           | -                 | SMD <b>0.04 SD lower</b> (0.14 lower to 0.05 higher) | ⊕○○○<br>Very low | IMPORTANT     |
| Cardoso E et al (2005) [16]    |                   |                           |                           |              |             |                                                  |                |              |                   |                                                      |                  |               |
| 5                              | randomised trials | very serious <sup>a</sup> | very serious <sup>a</sup> | not serious  | not serious | publication bias strongly suspected <sup>a</sup> | 122            | 123          | -                 | SMD <b>0.95 SD lower</b> (1.17 lower to 0.74 lower)  | ⊕○○○<br>Very low | CRITICAL      |
| Rosales R et al (2008) [15]    |                   |                           |                           |              |             |                                                  |                |              |                   |                                                      |                  |               |
| 9                              | randomised trials | not serious <sup>b</sup>  | very serious <sup>c</sup> | not serious  | not serious | publication bias strongly suspected <sup>a</sup> | 236            | 228          | -                 | SMD <b>0.87 SD lower</b> (1.22 lower to 0.52 lower)  | ⊕○○○<br>Very low | CRÍTICO       |
| Elia AE et al (2009) [14]      |                   |                           |                           |              |             |                                                  |                |              |                   |                                                      |                  |               |
| 11                             | randomised trials | serious <sup>d</sup>      | very serious <sup>a</sup> | not serious  | not serious | publication bias strongly suspected <sup>a</sup> | 89             | 90           | -                 | SMD <b>0.98 SD lower</b> (1.17 lower to 0.78 lower)  | ⊕○○○<br>Very low | IMPORTANTE    |
| Koog YH and Min BI (2010) [41] |                   |                           |                           |              |             |                                                  |                |              |                   |                                                      |                  |               |
| 15                             | randomised trials | serious <sup>d</sup>      | very serious <sup>c</sup> | not serious  | not serious | publication bias strongly suspected <sup>a</sup> | 309            | 288          | -                 | SMD <b>0.27 SD lower</b>                             | ⊕○○○<br>Very low | NOT IMPORTANT |



|                                    |                      |                              |                           |             |             |                                                     |     |     |   |                                                                         |                  |                  |
|------------------------------------|----------------------|------------------------------|---------------------------|-------------|-------------|-----------------------------------------------------|-----|-----|---|-------------------------------------------------------------------------|------------------|------------------|
|                                    |                      |                              |                           |             |             |                                                     |     |     |   | (0.8<br>lower to<br>0.26<br>higher)                                     |                  |                  |
| Baker Ja and Pereira G (2013) [13] |                      |                              |                           |             |             |                                                     |     |     |   |                                                                         |                  |                  |
| 37                                 | randomised<br>trials | serious <sup>d</sup>         | very serious <sup>c</sup> | not serious | not serious | publication bias<br>strongly suspected <sup>a</sup> | 723 | 551 | - | SMD<br><b>0.88 SD<br/>lower</b><br>(1.14<br>lower to<br>0.63<br>lower)  | ⊕○○○<br>Very low | CRITICAL         |
| Wu T et al (2016) [12]             |                      |                              |                           |             |             |                                                     |     |     |   |                                                                         |                  |                  |
| 7                                  | randomised<br>trials | serious <sup>d</sup>         | serious <sup>e</sup>      | not serious | not serious | publication bias<br>strongly suspected <sup>f</sup> | 293 | 301 | - | SMD<br><b>0.66 SD<br/>lower</b><br>(1.11<br>lower to<br>0.22<br>lower)  | ⊕○○○<br>Very low | CRITICAL         |
| Dong Y et al (2017) [11]           |                      |                              |                           |             |             |                                                     |     |     |   |                                                                         |                  |                  |
| 22                                 | randomised<br>trials | serious <sup>d</sup>         | serious <sup>g</sup>      | not serious | not serious | publication bias<br>strongly suspected <sup>f</sup> | 902 | 902 | - | SMD<br><b>0.81 SD<br/>lower</b><br>(0.93<br>lower to<br>0.68<br>lower)  | ⊕○○○<br>Very low | CRITICAL         |
| Guyot et al (2019) [18]            |                      |                              |                           |             |             |                                                     |     |     |   |                                                                         |                  |                  |
| 10                                 | randomised<br>trials | serious <sup>a</sup>         | very serious <sup>c</sup> | not serious | not serious | publication bias<br>strongly suspected <sup>a</sup> | 130 | 130 | - | SMD <b>0.1<br/>SD<br/>lower</b><br>(0.3<br>lower to<br>0.1<br>higher)   | ⊕○○○<br>Very low | NOT<br>IMPORTANT |
| Blumetti FC et al (2019) [19]      |                      |                              |                           |             |             |                                                     |     |     |   |                                                                         |                  |                  |
| 31                                 | randomised<br>trials | very<br>serious <sup>h</sup> | not serious <sup>e</sup>  | not serious | not serious | publication bias<br>strongly suspected <sup>a</sup> | 33  | 32  | - | SMD<br><b>0.42 SD<br/>higher</b><br>(0.65<br>lower to<br>0.18<br>lower) | ⊕○○○<br>Very low | IMPORTANT        |
| Sun LC et al (2019) [10]           |                      |                              |                           |             |             |                                                     |     |     |   |                                                                         |                  |                  |

|                              |                   |                           |                           |             |             |                                                  |      |      |   |                                                           |                  |          |
|------------------------------|-------------------|---------------------------|---------------------------|-------------|-------------|--------------------------------------------------|------|------|---|-----------------------------------------------------------|------------------|----------|
| 27                           | randomised trials | very serious <sup>h</sup> | very serious <sup>c</sup> | not serious | not serious | none                                             | 234  | 324  | - | SMD<br><b>0.76 SD lower</b><br>(0.97 lower to 0.55 lower) | ⊕○○○<br>Very low | CRITICAL |
| Jia S et al (2020) [42]      |                   |                           |                           |             |             |                                                  |      |      |   |                                                           |                  |          |
| 10                           | randomised trials | very serious <sup>h</sup> | serious <sup>g</sup>      | not serious | not serious | publication bias strongly suspected <sup>a</sup> | 475  | 475  | - | SMD<br><b>0.33 SD lower</b><br>(0.54 lower to 0.12 lower) | ⊕○○○<br>Very low | CRÍTICO  |
| Doan TN et al (2021) [38]    |                   |                           |                           |             |             |                                                  |      |      |   |                                                           |                  |          |
| 12                           | randomised trials | not serious <sup>b</sup>  | serious <sup>g</sup>      | not serious | not serious | publication bias strongly suspected <sup>i</sup> | 524  | 504  | - | SMD<br><b>0.45 SD lower</b><br>(0.73 lower to 0.18 lower) | ⊕⊕○○<br>Low      | CRITICAL |
| Ojardias E et al (2022) [17] |                   |                           |                           |             |             |                                                  |      |      |   |                                                           |                  |          |
| 37                           | randomised trials | serious <sup>d</sup>      | very serious <sup>a</sup> | not serious | not serious | publication bias strongly suspected <sup>a</sup> | 1505 | 1506 | - | SMD<br><b>0.11 SD lower</b><br>(0.18 lower to 0.04 lower) | ⊕○○○<br>Very low | CRITICAL |

**CI:** confidence interval; **SMD:** standardised mean difference

a. Non reported

b. Low risk of bias

c. Considerable heterogeneity

d. Some concerns

e. Moderate heterogeneity

f. Small number of studies

g. Substantial heterogeneity

h. High risk of bias

i. Egger's test statistically significant
